# Supplementary material for: Predictive Value of C-Reactive Protein/Triglyceride-Glucose Index on the All-cause Mortality among Middle-Aged and Older Chinese Adults: A Prospective Cohort Study from CHARLS
Source: Research Square preprint supplement (doi:10.21203/rs.3.rs-8358890/v1), 2026-01-12
Supplement: Supplementary file 1 [file be48bf92aefb4848337ec5b0.docx]

**Supplementary materials**

**Predictive Value of C-Reactive Protein/Triglyceride-Glucose Index on the All-cause Mortality among Middle-Aged and Older Chinese Adults: A Prospective Cohort Study from CHARLS**

Lili ZHANG1†, Ruijie TANG2†, Yuyan XIONG3, Xianpei WANG1, Zhanying HAN2*, Chuanyu GAO1*

1. Department of Cardiology of Central China Fuwai Hospital, Henan Key Laboratory for Coronary Heart Disease Prevention and Control, Central China Fuwai Hospital of Zhengzhou University, Zhengzhou, Henan, 450003, China.
2. Department of Cardiology, The First Affiliated Hospital of Zhengzhou University, No.1 Jianshe East Road, Zhengzhou, China.
3. Department of Cardiology, Union Hospital, Tongji Medical College, Huazhong University of Science and Technology, Wuhan 430022, China.

**†These authors contributed equally to this work**

***Co-corresponding authors:**

**Zhanying HAN, E-mail addresses:** zy91@163.com

**Chuanyu GAO, E-mail addresses:** gaochuanyu2025@163.com

**Supplementary Figure1** Receiver-operating characteristics (ROC) curves of base model and full model for predicting all-cause Mortality.

**
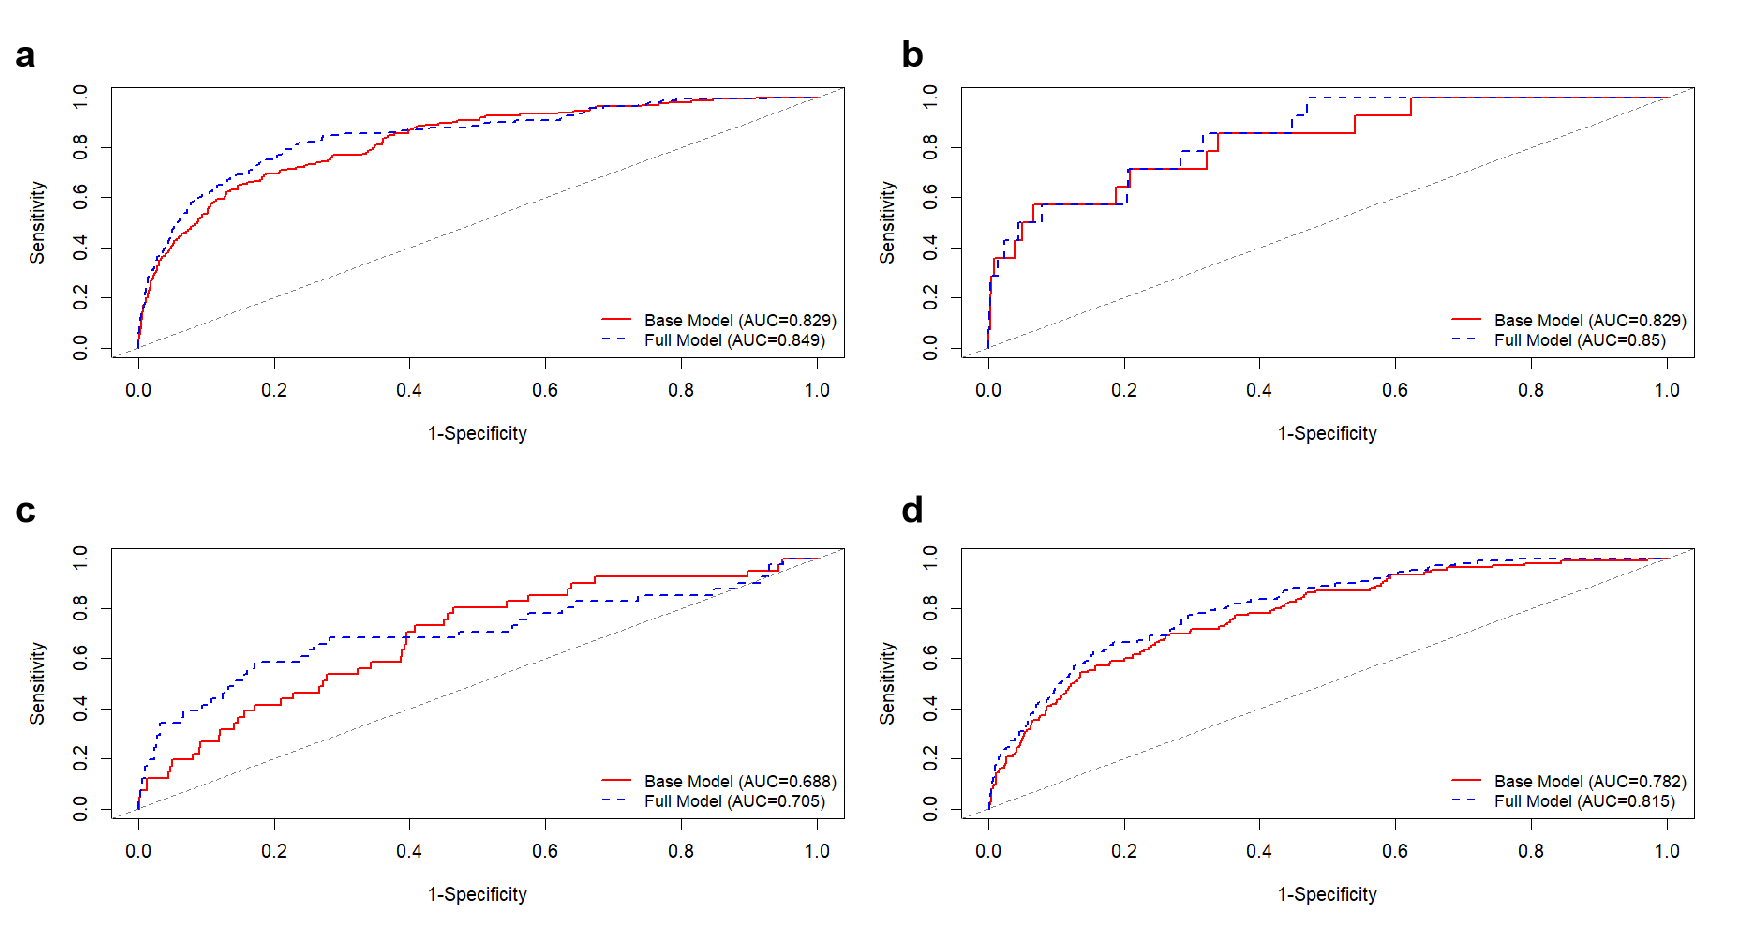
**

**Supplementary Figure1** Receiver-operating characteristics (ROC) curves of base model and full model for predicting all-cause Mortality. (A) ROC of base model and full model in all samples. (B) ROC of base model and full model in aged 45–54 years group. (C) ROC of base model and full model in aged 55–64 years group. (D) ROC of base model and full model in aged 65 years and above group. These ROC curves were adjusted for residence, age, gender, education level, marital status, BMI, drinking, smoking, hypertension, dyslipidemia, diabetes, HbAlc, BUN, HDL, LDL, SBP, DBP, cholesterol, creatine.
